# Supplementary material
Source: MDPI journal article supplement (https://www.mdpi.com/1424-2818/15/11/1120)
Supplement: s1 [file s1]

Table S1: Characteristics Species Composition of Habitats of Community Interest (HCI)  
Based on Our Phytosociological Expertise in the study Area.

| GROUP 1                                     | Coastal and halophytic habitats                                                                       |
|---------------------------------------------|-------------------------------------------------------------------------------------------------------|
| <b>1150*</b>                                | <b>*Coastal lagoons <i>Ruppium drepanensis</i>/ <i>Ruppium cirrhosae</i>/ <i>Ruppium spiralis</i></b> |
| <i>Ruppia maritima</i> var. <i>maritima</i> | <i>Ruppion maritimae</i> (RUPPIETEA)                                                                  |
| <i>Ruppia cirrhosa</i>                      |                                                                                                       |
| <i>Althenia orientalis</i>                  | <i>Ruppion maritimae</i> (RUPPIETEA)                                                                  |
| <i>Najas marina</i> . subsp. <i>armata</i>  |                                                                                                       |
| <i>Potamogeton</i>                          |                                                                                                       |
| <i>Lemna minor</i>                          |                                                                                                       |
| <b>1210</b>                                 | <b>Annual vegetation of drift lines</b>                                                               |
| <i>Cakile maritima</i>                      | <i>Cakilion maritimae</i> (CAKILETEA)                                                                 |
| <i>Salsola kali</i>                         | <i>Cakiletea maritimae</i> (CAKILETEA)                                                                |
| <i>Beta maritima</i>                        | <i>Cakiletea maritimae</i>                                                                            |
| <i>Chamaesyce peplis</i>                    | <i>Cakiletea maritimae</i> (CAKILETEA)                                                                |
| <b>1240*</b>                                | <b>+ Vegetated sea cliffs with endemic <i>Limonium</i> spp.</b>                                       |
| <i>Crithmum maritimum</i>                   | <i>Crithmo-Limonietea</i>                                                                             |
| <i>Limonium malacitanum</i>                 | <i>Crithmo-Limonion</i>                                                                               |
| <i>Limonium cossonianum</i>                 | <i>Limonietalia</i>                                                                                   |
| <i>Lavatera mauritanica</i>                 |                                                                                                       |
| <i>Asteriscus maritimus</i>                 | <i>Crithmo-Limonietea</i>                                                                             |
| <i>Limonium delicatulum</i>                 |                                                                                                       |
| <i>Limonium ferulaceum</i>                  |                                                                                                       |
| <i>Limonium insigne</i>                     |                                                                                                       |
| <i>Rosmarinus tomentosus</i>                | <i>Rosmarinetum tomentosi</i>                                                                         |
| <i>Plantago macrorhiza</i>                  | <i>Limonietalia</i>                                                                                   |
| <i>Frankenia hirsuta</i>                    | Shared with <i>Pegano-Salsolitea</i>                                                                  |
| <i>Frankenia corymbosa</i>                  | Shared with <i>Pegano-Salsolitea</i>                                                                  |
| <b>1310</b>                                 | <b><i>Salicornia</i> and other annuals colonising mud and sand</b>                                    |
| <i>Hordeum marinum</i>                      | <i>Hordeion marini</i> (SAGINETEA MARITIMAE)                                                          |
| <i>Parapholis incurva</i>                   | <i>Saginetea maritimae</i> (SAGINETEA MARITIMAE)                                                      |
| <i>Frankenia pulverulenta</i>               | <i>Frankenietalia pulverulentae</i> (SAGINETEA MARITIMAE)                                             |
| <i>Spergularia bocconeii</i>                |                                                                                                       |
| <i>Spergularia nicaensis</i>                |                                                                                                       |
| <i>Spergularia heldreichii</i>              |                                                                                                       |
| <i>Spergularia marina</i>                   | <i>Saginetea maritimae</i> (SAGINETEA MARITIMAE)                                                      |
| <i>Polypogon maritimus</i>                  |                                                                                                       |
| <i>Salicornia ramosissima</i>               |                                                                                                       |
| <i>Suaeda spicata</i>                       |                                                                                                       |
| <i>Catapodium maritimum</i>                 |                                                                                                       |
| <i>Sphenopus divaricatus</i>                |                                                                                                       |
| <b>1410</b>                                 | <b>Mediterranean salt meadows (<i>Juncetalia maritimi</i>)</b>                                        |
| <i>Plantago maritima</i>                    |                                                                                                       |
| <i>Juncus maritimus</i>                     | <i>Juncetea maritimi</i>                                                                              |
| <i>Juncus acutus</i>                        | <i>Juncetea maritimi</i>                                                                              |
| <i>Tetragonolobus maritimus</i>             | <i>Juncetalia maritimi</i>                                                                            |
| <i>Puccinellia fasciculata</i>              | <i>Juncion maritimi</i>                                                                               |
| <i>Sonchus maritimus</i>                    |                                                                                                       |
| <i>Carex extensa</i>                        | <i>Juncetalia maritimi</i>                                                                            |
| <i>Juncus subulatus</i>                     |                                                                                                       |
| <i>Dorycnium gracile</i>                    |                                                                                                       |
| <b>1420</b>                                 | <b>Mediterranean and thermo-Atlantic halophilous scrubs (<i>Sarcocornetea fruticosi</i>)</b>          |
| <i>Suaeda vera</i> subsp. <i>vera</i>       | <i>Suaedion verae</i>                                                                                 |
| <i>Halimione portulacoides</i>              | <i>Arthrocnemion macrostachyi</i>                                                                     |
| <i>Limoniastrum monopetalum</i>             | <i>Sarcocornietalia fruticosae</i>                                                                    |
| <i>Frankenia corymbosa</i>                  | <i>Limoniastrion monopetali</i>                                                                       |
| <i>Frankenia laevis</i>                     |                                                                                                       |

|                                                    |                                                                                         |
|----------------------------------------------------|-----------------------------------------------------------------------------------------|
| <i>Sarcocornia perennis</i>                        |                                                                                         |
| <i>Sarcocornia fruticosa</i>                       |                                                                                         |
| <i>Inula crithmoides</i>                           | <i>Sarcocornietea fruticosae</i>                                                        |
| <b>1430</b>                                        | <b>Halo-nitrophilous scrubs (<i>Pegano-Salsoletea</i>)</b>                              |
| <i>Atriplex halimus</i>                            | <i>Salsolo vermiculatae-Peganelalia harmalae</i>                                        |
| <i>Atriplex glauca</i>                             | <i>Atriplici-Hammadion articulatae</i>                                                  |
| <i>Salsola oppositifolia</i>                       | <i>Salsolo vermiculatae-Peganelalia harmalae</i>                                        |
| <i>Whitania frutescens</i>                         | <i>Salsolo vermiculatae-Peganelalia harmalae</i>                                        |
| <i>Lycium intrincatum</i>                          | <i>Pegano-Salsoletea</i>                                                                |
| <i>Suaeda vera</i> subsp. <i>vera</i>              | <i>Salsolo-Peganion harmalae</i>                                                        |
| <i>Fagonia cretica</i>                             | <i>Salsolo-Peganion harmalae</i>                                                        |
| <i>Frankenia hirsuta</i>                           | <i>Atriplici-Hammadion articulatae</i>                                                  |
| <i>Anabasis articulata</i>                         |                                                                                         |
| <i>Frankenia corymbosa</i>                         |                                                                                         |
| <i>Artemisia campestris</i>                        |                                                                                         |
| <i>Hamada articulata</i>                           |                                                                                         |
| <b>GROUP 2</b>                                     | <b>Coastal sand dunes and inland dunes</b>                                              |
| <b>2110*</b>                                       | <b>*Embryonic shifting dunes</b>                                                        |
| <i>Elymus farctus</i> ( <i>Agropyron junceum</i> ) | <i>Sporobolion arenarii</i> para <i>Sporobolus arenarius</i>                            |
| <i>Sporobolus pungens</i>                          |                                                                                         |
| <i>Euphorbia peplis</i>                            | <i>Ammophiletalia</i>                                                                   |
| <i>Eryngium maritimum</i>                          | <i>Ammophiletea</i>                                                                     |
| <i>Pancratium maritimum</i>                        |                                                                                         |
| <i>Lotus arenarius</i>                             |                                                                                         |
| <i>Cyperus capitatus</i>                           |                                                                                         |
| <i>Euphorbia paralias</i>                          |                                                                                         |
| <i>Centaurea sphaerocep</i>                        | <i>Ammophiletea</i>                                                                     |
| <b>2120*</b>                                       | <b>*Shifting dunes along the shoreline with <i>Ammophila arenaria</i> (white dunes)</b> |
| <i>Ammophila arenaria</i>                          |                                                                                         |
| <i>Euphorbia paralias</i>                          |                                                                                         |
| <i>Otanthus maritimus</i>                          |                                                                                         |
| <i>Medicago marina</i>                             |                                                                                         |
| <i>Polygonum maritimum</i>                         |                                                                                         |
| <i>Lotus creticus</i>                              |                                                                                         |
| <i>Medicago marina</i>                             |                                                                                         |
| <i>Lotus cytisoides</i>                            |                                                                                         |
| <b>2190*</b>                                       | <b>*Humid dune slacks</b>                                                               |
| <i>Tamarix</i> sp.                                 | <i>Tamaricetalia</i>                                                                    |
| <i>Scirpoides holoschoenus</i>                     | <i>Holoschoenetalia vulgari</i>                                                         |
| <i>Juncus acutus</i>                               | <i>Juncetalia maritimi</i> :                                                            |
| <i>Juncus maritimus</i>                            | <i>Juncetea maritimi</i>                                                                |
| <i>Galium palustre</i>                             | <i>Magnocaricetalia</i> :                                                               |
| <i>Saccharum ravennae</i>                          | <i>Imperato-Saccharion ravennae</i>                                                     |
| <i>Schoenus nigricans</i>                          | <i>Molinio-Arrhenatheretea</i>                                                          |
| <b>2210*</b>                                       | <b>*Crucianellion maritimae fixed beach dunes</b>                                       |
| <i>Crucianella maritima</i>                        |                                                                                         |
| <i>Pancratium maritimum</i>                        |                                                                                         |
| <i>Ononis talaverae</i>                            |                                                                                         |
| <i>Ononis ramosissima</i>                          |                                                                                         |
| <i>Polygonum maritimum</i>                         |                                                                                         |
| <i>Silene nicaeensis</i>                           |                                                                                         |
| <i>Pycnocomon rutifolium</i>                       |                                                                                         |
| <i>Pycnocomon intermedium</i>                      |                                                                                         |
| <i>Reichardia gaditana</i>                         |                                                                                         |
| <b>2230_0*</b>                                     | <b>*Malcolmietalia dune grasslands</b>                                                  |
| <i>Linaria pedunculata</i>                         |                                                                                         |
| <i>Silene littorea</i>                             |                                                                                         |
| <i>Hedypnois arenaria</i>                          |                                                                                         |

|                                                       |                                                                                                      |
|-------------------------------------------------------|------------------------------------------------------------------------------------------------------|
| <i>Pseudorlaya pumila</i>                             |                                                                                                      |
| <i>Malcomia littorea</i>                              |                                                                                                      |
| <i>Vulpia alopecuros</i>                              |                                                                                                      |
| <b>2250*</b>                                          | <b>*Coastal dunes with <i>Juniperus</i> spp.</b>                                                     |
| <i>Juniperus turbinata</i> subsp. <i>turbinata</i>    |                                                                                                      |
| <i>Osyris quadripaertita</i>                          |                                                                                                      |
| <i>Rhammus oleoides</i>                               |                                                                                                      |
| <i>Pistacia lentiscus</i>                             |                                                                                                      |
| <b>2260_2</b>                                         | <b>*High sclerophyllous scrubs on coastal dunes</b>                                                  |
| <i>Pistacia lentiscus</i>                             |                                                                                                      |
| <i>Calicotome villosa</i>                             |                                                                                                      |
| <i>Asparagus aphyllus</i>                             |                                                                                                      |
| <i>Phillyrea</i> sp.                                  |                                                                                                      |
| <i>Rhamnus oleoides</i>                               |                                                                                                      |
| <i>Chamaerops humilis</i>                             |                                                                                                      |
| <i>Myrtus comunis</i>                                 |                                                                                                      |
| <i>Juniperus phoenicia</i> subsp. <i>turbinata</i>    |                                                                                                      |
| <b>2270*</b>                                          | <b>Wooded dunes with <i>Pinus pinea</i> and/or <i>Pinus pinaster</i></b>                             |
| <i>Pinus pinea</i>                                    |                                                                                                      |
| <i>Pinus pinaster</i>                                 |                                                                                                      |
| <i>Juniperus turbinata</i> subsp. <i>turbinata</i>    |                                                                                                      |
| <i>Juniperus phoenicea</i> subsp. <i>turbinata</i>    |                                                                                                      |
| <i>Pistacia lentiscus</i>                             |                                                                                                      |
| <i>Rhamnus alaternus</i>                              |                                                                                                      |
| <i>Phyllirea angustifolia</i>                         |                                                                                                      |
| <i>Asparagus albus</i>                                |                                                                                                      |
| <i>Smilax aspera</i>                                  |                                                                                                      |
| <i>Aristolochia baetica</i>                           |                                                                                                      |
| <i>Rubia peregrina</i>                                |                                                                                                      |
| <i>Chamaerops humilis</i>                             |                                                                                                      |
| <i>Halimium halimifolium</i>                          |                                                                                                      |
| <b>GROUP 3</b>                                        | <b>Freshwater habitats</b>                                                                           |
| <b>3150_0*</b>                                        | <b>*Natural eutrophic lakes</b>                                                                      |
| <i>Lemna minor</i>                                    |                                                                                                      |
| <i>Potamogeton</i>                                    |                                                                                                      |
| <b>3250</b>                                           | <b>Constantly flowing Mediterranean rivers with <i>Glaucium flavum</i></b>                           |
| <i>Glaucium flavum</i>                                |                                                                                                      |
|                                                       |                                                                                                      |
| <b>GROUP 5</b>                                        | <b>Sclerophyllous scrub (matorral)</b>                                                               |
| <b>5220*</b>                                          | <b>*Arborescent scrubs with <i>Ziziphus</i></b>                                                      |
| <i>Ziziphus lotus</i>                                 |                                                                                                      |
| <i>Periploca angustifolia</i> subsp. <i>laevigata</i> |                                                                                                      |
| <i>Maytenus senegalensis</i> subsp. <i>europaea</i>   |                                                                                                      |
| <i>Withania frutescens</i>                            |                                                                                                      |
| <b>5330</b>                                           | <b>Thermo-Mediterranean and pre-desert scrub</b>                                                     |
| <b>5330_1</b>                                         | <b>Arborescent scrubs of <i>Arbutus unedo</i> and other lauroid shrubs (<i>Ericion arboreae</i>)</b> |
| <i>Arbutus unedo</i>                                  | <i>Ericion arboreae</i>                                                                              |
| <i>Viburnum tinus</i>                                 | <i>Quercetalia ilicis</i>                                                                            |
| <i>Phyllirea angustifolia</i>                         |                                                                                                      |
| <i>Cytisus arboreus</i> subsp. <i>baeticus</i>        |                                                                                                      |
| <i>Teline monspessulana</i>                           | <i>Cytiso-Telinetalia monspessulana</i>                                                              |
| <i>Phyllirea latifolia</i>                            |                                                                                                      |
| <b>5330_5</b>                                         | <b>Thermophilic and xerophilic Mediterranean thymes (<i>ROSMARINETEA OFFICINALIS</i>)</b>            |

|                                                |                                                                                                       |
|------------------------------------------------|-------------------------------------------------------------------------------------------------------|
| <i>Odontites purpurea</i>                      |                                                                                                       |
| <i>Thymus baeticus</i>                         | <i>Lavandulion lanatae</i>                                                                            |
| <i>Thymra capitata</i>                         | <i>Saturejo-Thymbrion capitatae</i>                                                                   |
| <i>Teucrium lusitanicum</i>                    |                                                                                                       |
| <i>Satureja obovata</i>                        |                                                                                                       |
| <i>Fumana thymifolia</i>                       |                                                                                                       |
| <i>Helianthemum hirtum</i>                     | <i>Rosmarinetalia officinalis</i>                                                                     |
| <i>Helianthemum almeriense</i>                 | <i>Thymo-Sideritidion leucanthae</i>                                                                  |
| <i>Rosmarinus officinalis</i>                  |                                                                                                       |
| <i>Cistus clusii</i>                           |                                                                                                       |
| <i>Cistus albidus</i>                          |                                                                                                       |
| <i>Ulex parviflorus</i>                        | <i>Lavandulion lanatae</i>                                                                            |
| <i>Genista umbellata</i>                       |                                                                                                       |
| <i>Phlomis purpurea</i>                        |                                                                                                       |
| <i>Sideritis incana</i>                        |                                                                                                       |
| <i>Anthyllis cytisoides</i>                    |                                                                                                       |
| <i>Helianthemum syriacum</i>                   |                                                                                                       |
| <i>Cistus clusii</i>                           |                                                                                                       |
| <i>Thymus granatensis</i>                      |                                                                                                       |
| <b>GROUP 6</b>                                 | <b>Natural and semi-natural grassland formations</b>                                                  |
| <b>6220*</b>                                   | <b>*Pseudo-steppe with grasses and annuals of the <i>Thero-Brachypodietea</i></b>                     |
| <b>6220_1*-</b>                                | <b>Neutro-basophilous Mediterranean perennial grasslands (<i>Lygeo-Stipetea</i>)*-</b>                |
| <i>Brachypodium retusum</i>                    | <i>Lygeo-Stipetea</i>                                                                                 |
| <i>Festuca scariosa</i>                        | <i>Festucion scariosae</i>                                                                            |
| <i>Dactylis hispanica</i>                      | <i>Lygeo-Stipetea</i>                                                                                 |
| <i>Avenula bromoides</i>                       | <i>Lygeo-Stipetalia</i>                                                                               |
| <i>Helictotrichon sarracenorum</i>             | Synonymous with <i>Helictotrichon filifolium</i> subsp. <i>velutinum</i> . <i>Festucion scariosae</i> |
| <i>Ruta chalepensis</i>                        |                                                                                                       |
| <b>GROUP 7</b>                                 | <b>Raised bogs and mires and fens</b>                                                                 |
| <b>7210_1</b>                                  | <b>Calcareous fens with <i>Cladium mariscus</i> in dunes and sands</b>                                |
| <i>Cladium mariscus</i>                        |                                                                                                       |
| <i>Carex hispida</i>                           |                                                                                                       |
| <i>Carex helata</i>                            |                                                                                                       |
| <b>GROUP 91</b>                                | <b>Forest of Boreal Europe</b>                                                                        |
| <b>91B0_0, 91B0_1</b>                          | <b>Thermophilous <i>Fraxinus angustifolia</i> woods</b>                                               |
| <i>Fraxinus angustifolia</i>                   | <i>Fraxino angustifoliae-Ulmenion minoris</i>                                                         |
| <i>Salix atrocinerea</i>                       | <i>Populetales albae</i>                                                                              |
| <i>Populus nigra</i>                           | <i>Salici-Populetea</i>                                                                               |
| <i>Salix salviifolia</i>                       | <i>Salicion salviifoliae</i>                                                                          |
| <i>Salix alba</i>                              | <i>Salicion albae</i>                                                                                 |
| <i>Salix pedicellata</i>                       | <i>Salicion pedicellatae</i>                                                                          |
| <i>Vitis vinifera</i> subsp. <i>sylvestris</i> | <i>Salici-Populetea</i>                                                                               |
| <i>Ulmus minor</i>                             | Riparian forest of <i>Ulmus minor</i>                                                                 |
| <b>GROUP 92</b>                                | <b><i>Salix alba</i> and <i>Populus alba</i> galleries</b>                                            |
| <b>92A0</b>                                    | <b><i>Salix alba</i> and <i>Populus alba</i> galleries</b>                                            |
| <b>92A0_0</b>                                  | <b><i>Populus</i> and <i>Salix</i> galleries</b>                                                      |
| <i>Populus alba</i>                            |                                                                                                       |
| <i>Salix alba</i>                              |                                                                                                       |
| <b>92A0_1+</b>                                 | <b>Riparian mixed forest of <i>Ulmus</i> and <i>Salix</i></b>                                         |
| <i>Salix alba</i>                              |                                                                                                       |
| <i>Salix x neotricha</i>                       |                                                                                                       |
| <i>Salix atrocinerea</i>                       |                                                                                                       |
| <i>Ulmus minor</i>                             |                                                                                                       |
| <b>92A0_2</b>                                  | <b>Riparian shrubland of <i>Salix</i></b>                                                             |
| <i>Salix atrocinerea</i>                       |                                                                                                       |
| <i>Salix eleagnos</i>                          |                                                                                                       |
| <i>Salix purpurea</i>                          |                                                                                                       |
| <i>Salix salviifolia</i>                       |                                                                                                       |
| <i>Salix pedicellata</i>                       |                                                                                                       |

|                            |                                                                            |
|----------------------------|----------------------------------------------------------------------------|
| <i>Salix fragilis</i>      |                                                                            |
| <i>Erica terminalis</i>    |                                                                            |
| <i>Erica erigena</i>       |                                                                            |
| <b>92D0_0</b>              | <b>Southern riparian galleries and thickets (<i>Nerio-Tamaricetea</i>)</b> |
| <i>Nerium oleander</i>     |                                                                            |
| <i>Tamarix canariensis</i> |                                                                            |
| <i>Tamarix boveana</i>     |                                                                            |
| <i>Vitex agnus-castus</i>  |                                                                            |
| <i>Tamarix africana</i>    |                                                                            |
| <i>Rubus ulmifolius</i>    |                                                                            |
| <i>Tamarix gallica</i>     |                                                                            |
| <i>Coriaria myrtifolia</i> |                                                                            |

Table S2: Classification of Habitat of community Interest (HCI) groups.

| CODE         | HIC NAME                                      |                                                                                                                 |
|--------------|-----------------------------------------------|-----------------------------------------------------------------------------------------------------------------|
| <b>1_H</b>   | <b>Halo/halo-nitrophilous vegetation</b>      |                                                                                                                 |
|              | 1430                                          | Halo-nitrophilous scrubs ( <i>Pegano-Salsoletea</i> )                                                           |
| <b>1_A</b>   | <b><i>Limonium</i> spp. habitats</b>          |                                                                                                                 |
|              | 1240 <sup>+</sup>                             | <sup>+</sup> Vegetated sea cliffs of the Mediterranean coasts with endemic <i>Limonium</i> spp.                 |
| <b>1_He*</b> | <b>Saline edaphohygrophilous vegetation</b>   |                                                                                                                 |
|              | 1310                                          | <i>Salicornia</i> and other annuals colonising mud and sand                                                     |
|              | 1410                                          | Mediterranean salt meadows ( <i>Juncetalia maritimi</i> )                                                       |
|              | 1420                                          | Mediterranean and thermo-Atlantic halophilous scrubs ( <i>Sarcocornetea fruticosi</i> )                         |
|              | 1510*                                         | Saline edaphohygrophilous vegetation ( <i>Limonietalia</i> )*                                                   |
| <b>1_L*</b>  | <b>Vegetation in flooded or wetland areas</b> |                                                                                                                 |
|              | 1150*                                         | *Coastal lagoons                                                                                                |
|              | 3150_0 <sup>+</sup>                           | Natural eutrophic lakes <sup>+</sup>                                                                            |
|              | 7210_1*                                       | Calcareous fens with <i>Cladium mariscus</i> in dunes and sands *                                               |
| <b>2_M</b>   | <b>Dunes with small shrubs</b>                |                                                                                                                 |
|              | 1210                                          | Annual vegetation of drift lines                                                                                |
|              | 2110 <sup>+</sup>                             | *Embryonic shifting dunes                                                                                       |
|              | 2120 <sup>+</sup>                             | *Shifting dunes along the shoreline with <i>Ammophila arenaria</i> (white dunes)                                |
|              | 2190 <sup>+</sup>                             | *Humid dune slacks                                                                                              |
|              | 2210 <sup>+</sup>                             | * <i>Crucianellion maritimae</i> fixed beach dunes                                                              |
|              | 2230_0 <sup>+</sup>                           | * <i>Malcolmietalia</i> dune grasslands                                                                         |
| <b>2_A*</b>  | <b>Dunes with tall shrubs and pine trees</b>  |                                                                                                                 |
|              | 2250*                                         | *Coastal dunes with <i>Juniperus</i> spp.                                                                       |
|              | 2260_2 <sup>+</sup>                           | *High sclerophyllous scrubland on coastal dunes                                                                 |
|              | 2270*                                         | Wooded dunes with <i>Pinus pinea</i> and/or <i>Pinus pinaster</i>                                               |
|              | 2180_2                                        | Wooded dunes of dune regions                                                                                    |
| <b>5_M</b>   | <b>Sclerophyllous scrubland</b>               |                                                                                                                 |
|              | 5330_5                                        | Thermophilic and xerophilic Mediterranean thymes                                                                |
| <b>5_M*</b>  | <b>Relict shrubland</b>                       |                                                                                                                 |
|              | 5220*                                         | *Arborescent matorral with <i>Ziziphus</i>                                                                      |
| <b>6_P*</b>  | <b>Mediterranean grassland</b>                |                                                                                                                 |
|              | 6220_0*-                                      | Mediterranean annual grasslands, neutro-basophilic and thermo-xerophytic ( <i>Trachynietalia distachyae</i> )*- |
|              | 6220_1*-                                      | Neutro-basophilous Mediterranean perennial grasslands( <i>Lygeo-Stipetea</i> )*-                                |

| 9_Br | Riparian forests (i.e. edaphohygrophilous vegetation). |                                                                                                          |
|------|--------------------------------------------------------|----------------------------------------------------------------------------------------------------------|
|      | 91B0_0, 91B0_1                                         | Thermophilous <i>Fraxinus angustifolia</i> woods (91B0_1; 91B0_0)                                        |
|      | 92A0_0                                                 | Riparian mixed forest of <i>Ulmus</i> and <i>Salix</i>                                                   |
|      | 92A0_1 <sup>+</sup>                                    | Riparian forest of <i>Ulmus minor</i> <sup>+</sup>                                                       |
|      | 92A0_2                                                 | <i>Salix</i> galleries                                                                                   |
|      | 92D0_0                                                 | Southern riparian galleries and thickets ( <i>Nerio-Tamaricetea</i> and <i>Securinegion tinctoriae</i> ) |
|      | 3250                                                   | Constantly flowing Mediterranean rivers with <i>Glaucium flavum</i>                                      |

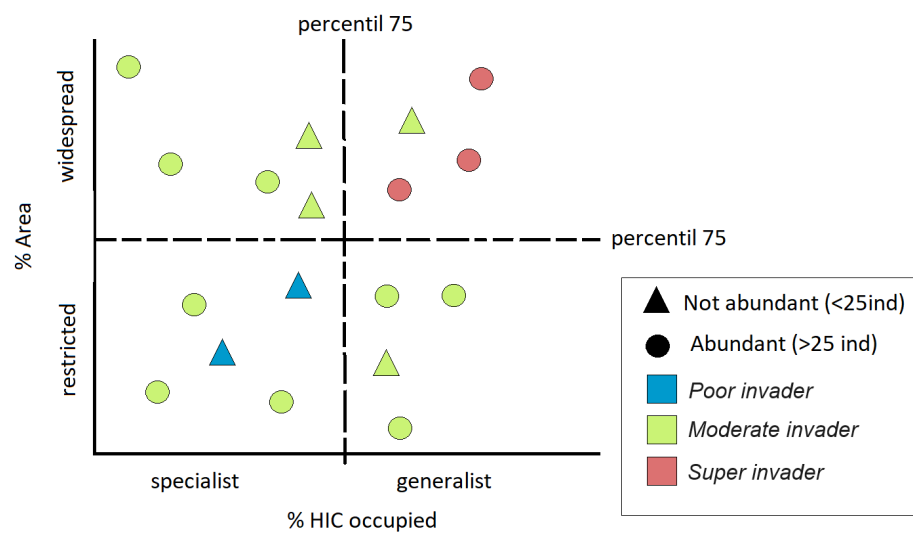

Figure S1. Schematic representation of the method used to estimate current invasion degree based on [32].

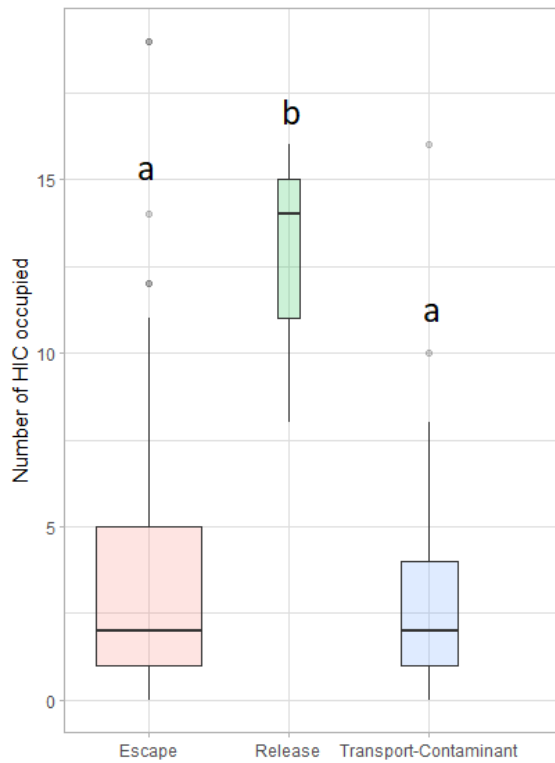

Figure S2. Number of occupied HIC per species classified by species introduction pathway (p-value < 0.03556).

Table S5. Total number of invasive species (super invader or potentially invader) by geographic area (protected or non-protected) and zonification. \*Current invasion categories follow our classification obtained in the section 3.2 and 3.4 of the manuscript. Area follows the classification used in section 2.6 of the manuscript.

| Area name                                                | *Super invader | *Potential ly invader | Total invasive species | Category               | *Zone       |
|----------------------------------------------------------|----------------|-----------------------|------------------------|------------------------|-------------|
| Calahonda-Castell de Ferro cliffs                        | 3              | 0                     | 3                      | natural protected area | prevention  |
| Charca Suárez                                            | 1              | 0                     | 1                      | natural protected area | prevention  |
| Dunas de Marbella                                        | 4              | 2                     | 6                      | natural protected area | eradication |
| From El Rincon de la Victoria to El Cantal and El Morche | 11             | 6                     | 17                     | non-protected area     | eradication |
| Guadaiza river                                           | 4              | 0                     | 4                      | natural protected area | eradication |
| Guadalmansa river                                        | 2              | 0                     | 2                      | natural protected area | prevention  |
| Guadalmina river                                         | 2              | 0                     | 2                      | natural protected area | prevention  |

|                            |    |   |    |                                                    |             |
|----------------------------|----|---|----|----------------------------------------------------|-------------|
| La rábita                  | 7  | 2 | 9  | non-protected<br>area<br>natural                   | eradication |
| Manilva river              | 3  | 0 | 3  | protected area<br>non-protected<br>area<br>natural | prevention  |
| Marbella bay               | 8  | 1 | 9  | protected area<br>non-protected<br>area<br>natural | eradication |
| Maro-Cerro Gordo cliffs    | 2  | 0 | 2  | protected area<br>non-protected<br>area<br>natural | prevention  |
| Mouth of guadalfeo river   | 10 | 2 | 12 | protected area<br>non-protected<br>area<br>natural | eradication |
| Mouth of gadalhorce river  | 5  | 0 | 5  | protected area<br>non-protected<br>area<br>natural | eradication |
| Nerja                      | 9  | 4 | 13 | protected area<br>non-protected<br>area<br>natural | eradication |
| Padrón river               | 4  | 2 | 6  | protected area<br>non-protected<br>area<br>natural | eradication |
| Punta Chullera             | 4  | 2 | 6  | protected area<br>non-protected<br>area<br>natural | eradication |
| Punta de la mona cliffs    | 1  | 2 | 3  | protected area<br>non-protected<br>area<br>natural | prevention  |
| Real river                 | 4  | 0 | 4  | protected area<br>non-protected<br>area<br>natural | eradication |
| Tesorillo-Salobreña cliffs | 2  | 1 | 3  | protected area<br>non-protected<br>area<br>natural | prevention  |
| Verde river                | 2  | 0 | 2  | protected area<br>Non-protected<br>area            | prevention  |
| Coastal areas of Motril    | 5  | 3 | 8  | Non-protected<br>area                              | eradication |
