# Supplementary material
Source: MDPI journal article supplement (https://www.mdpi.com/1424-2818/15/11/1120)
Supplement: s1 [file s1]

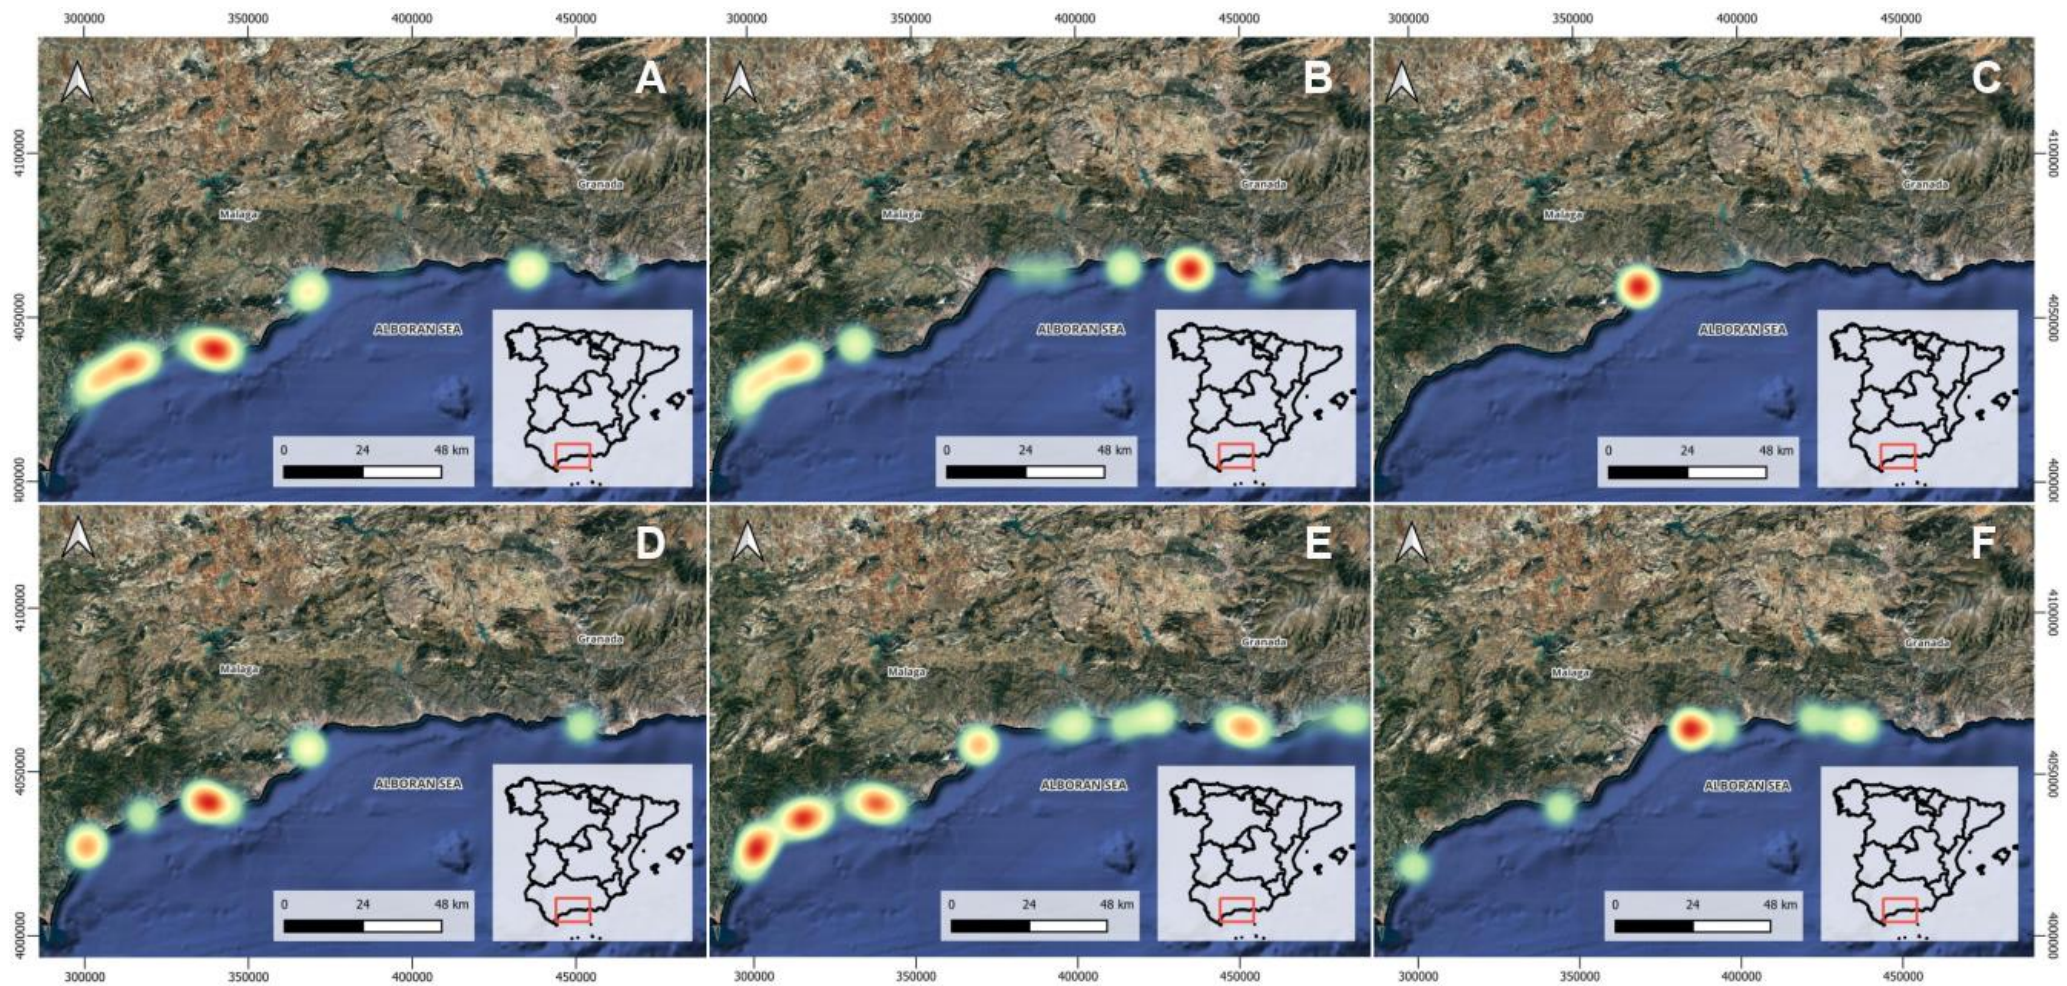

Figures S3: The heat distribution maps for super invaders A: *Acacia saligna* (Labill.) H.L.Wendl., B: *Agave americana* L., C: *Aizoon pubescens* Eckl. & Zeyh., D: *Arctotheca calendula* (L.) K.Lewin, E: *Arundo donax* L., F: *Austrocylindropuntia subulata* (Muehlenpf.) Backeb.



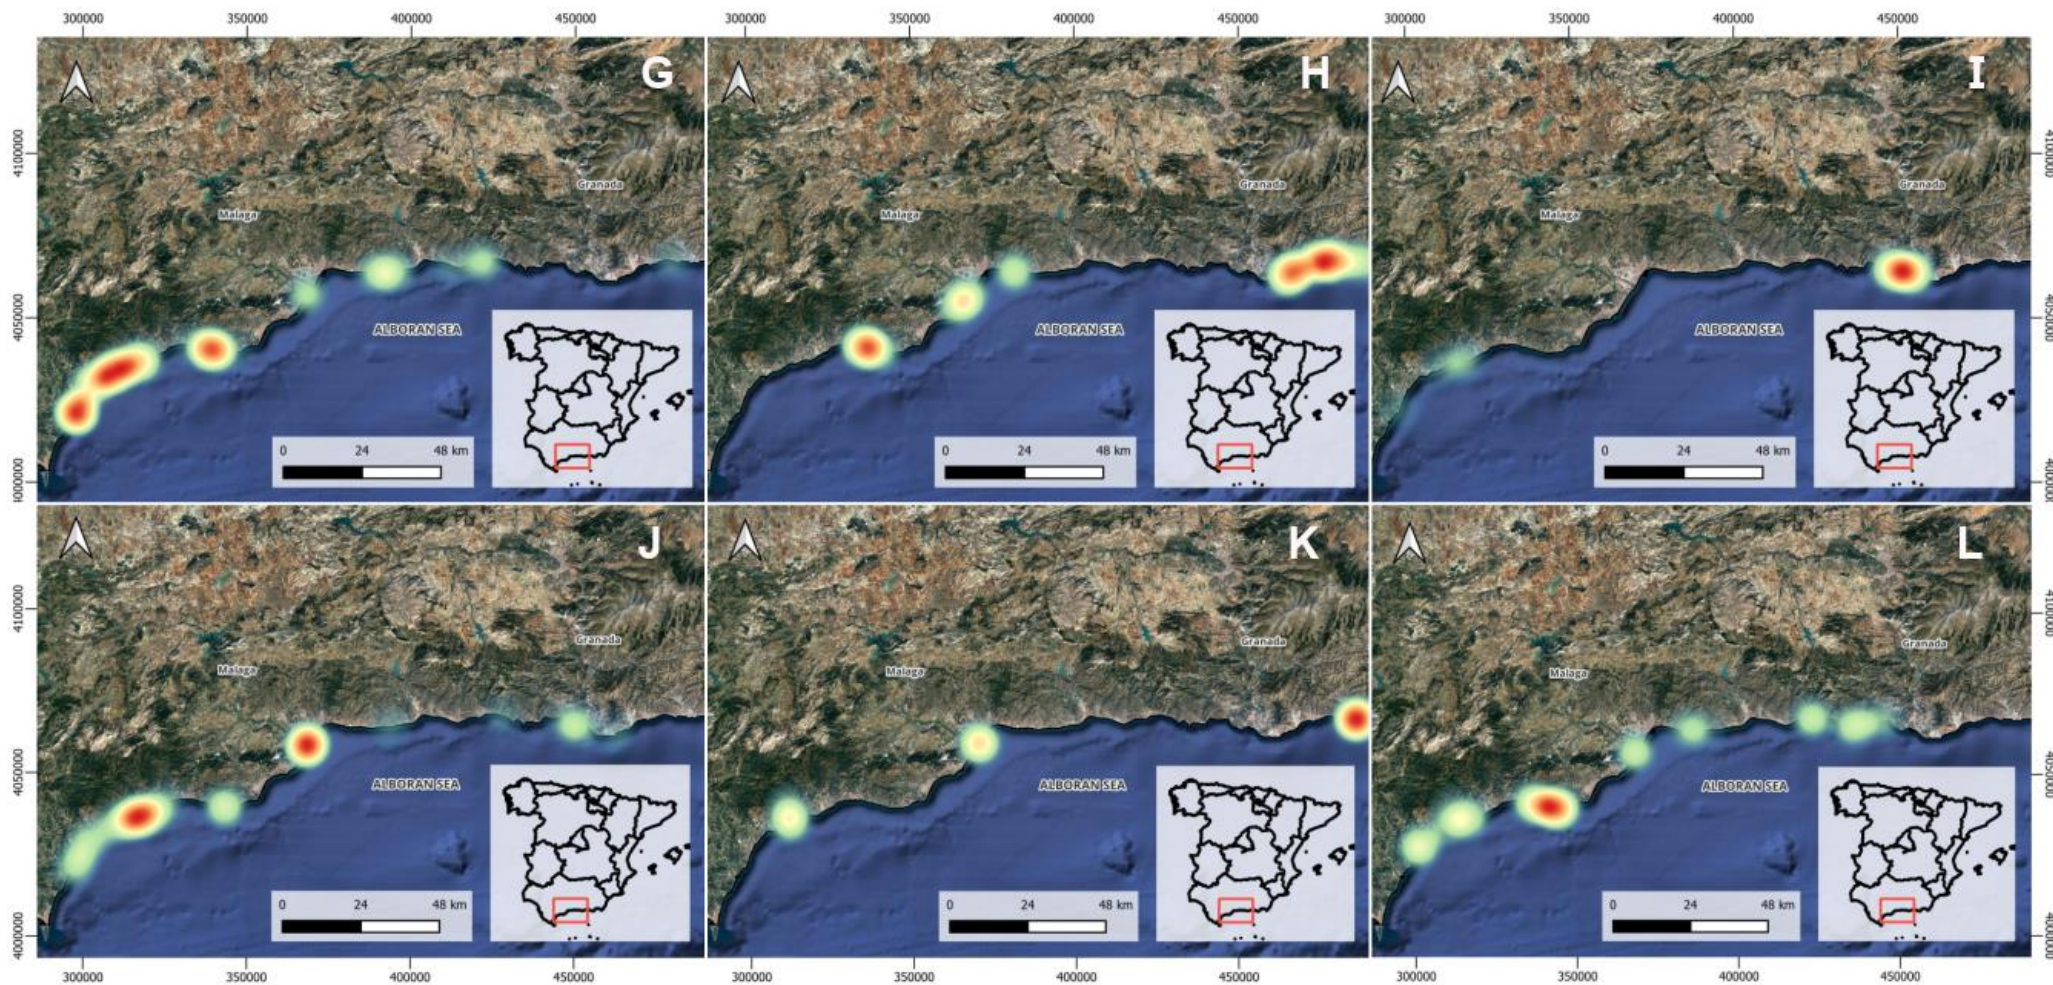

Figures S4: The heat distribution maps for super invaders. G: *Carpobrotus edulis* (L.) N.E.Br., H: *Cenchrus setaceus* (Forssk.) Morrone, I: *Cortaderia selloana* (Schult. & Schult.f.) Asch. & Graebn., J: *Eucalyptus camaldulensis* Dehnh., K: *Heliotropium curassavicum* L., L: *Lantana camara* L.



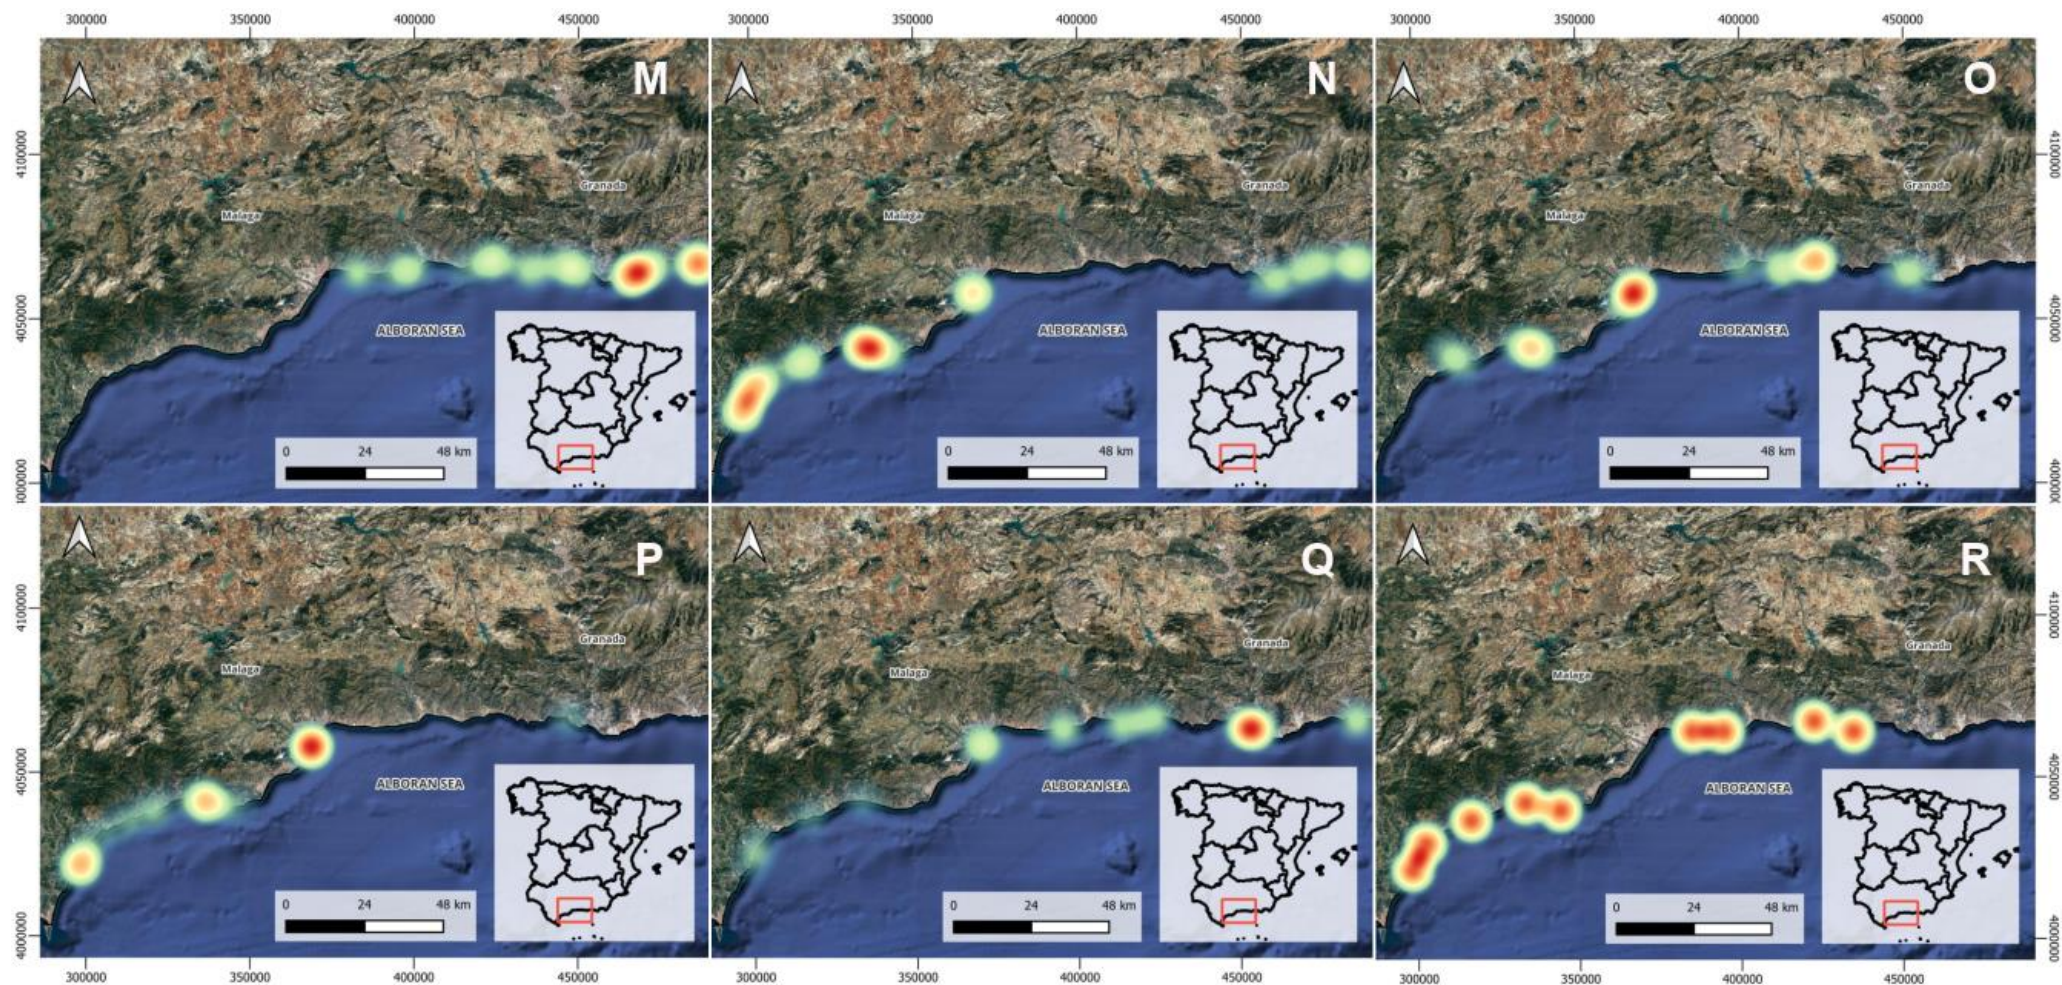

Figures S5: The heat distribution maps for super invaders. M: *Nicotiana glauca* Graham., N: *Oxalis pes-caprae* L., O: *Ricinus communis* L., P: *Stenotaphrum secundatum* (Walter) Kuntze, Q: *Xanthium orientale* L., R: *Yucca gigantea* Lem.



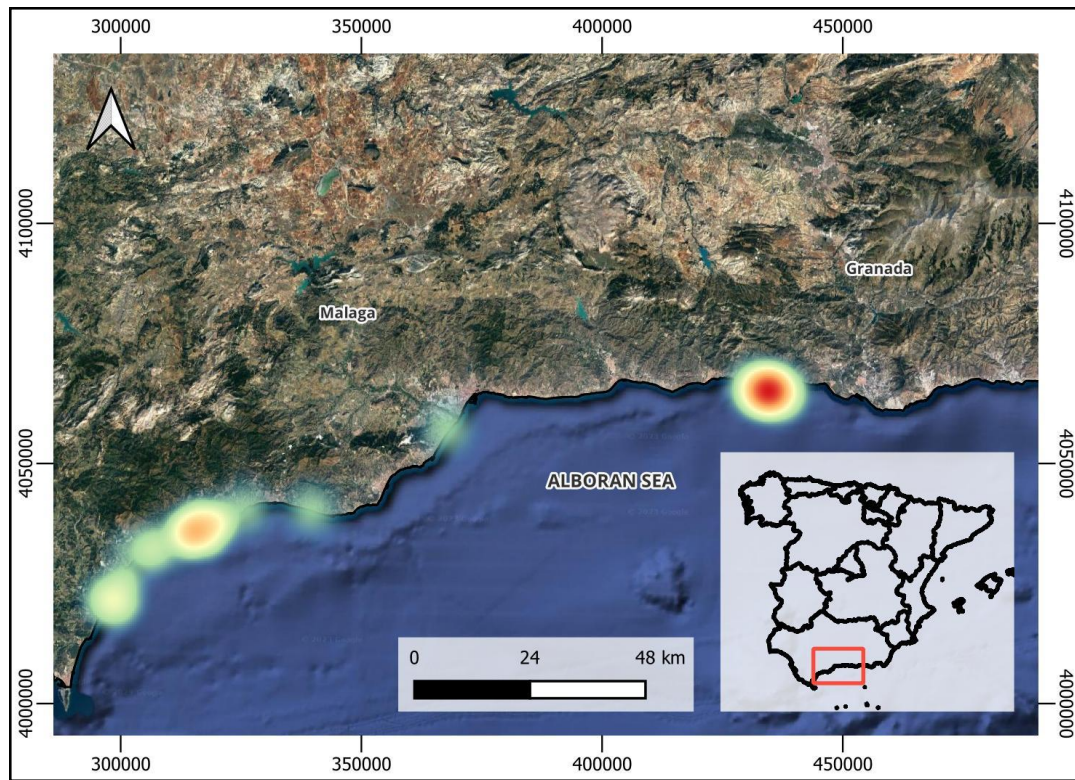

Figure S6: The heat distribution maps for super invaders: *Yucca* sp.



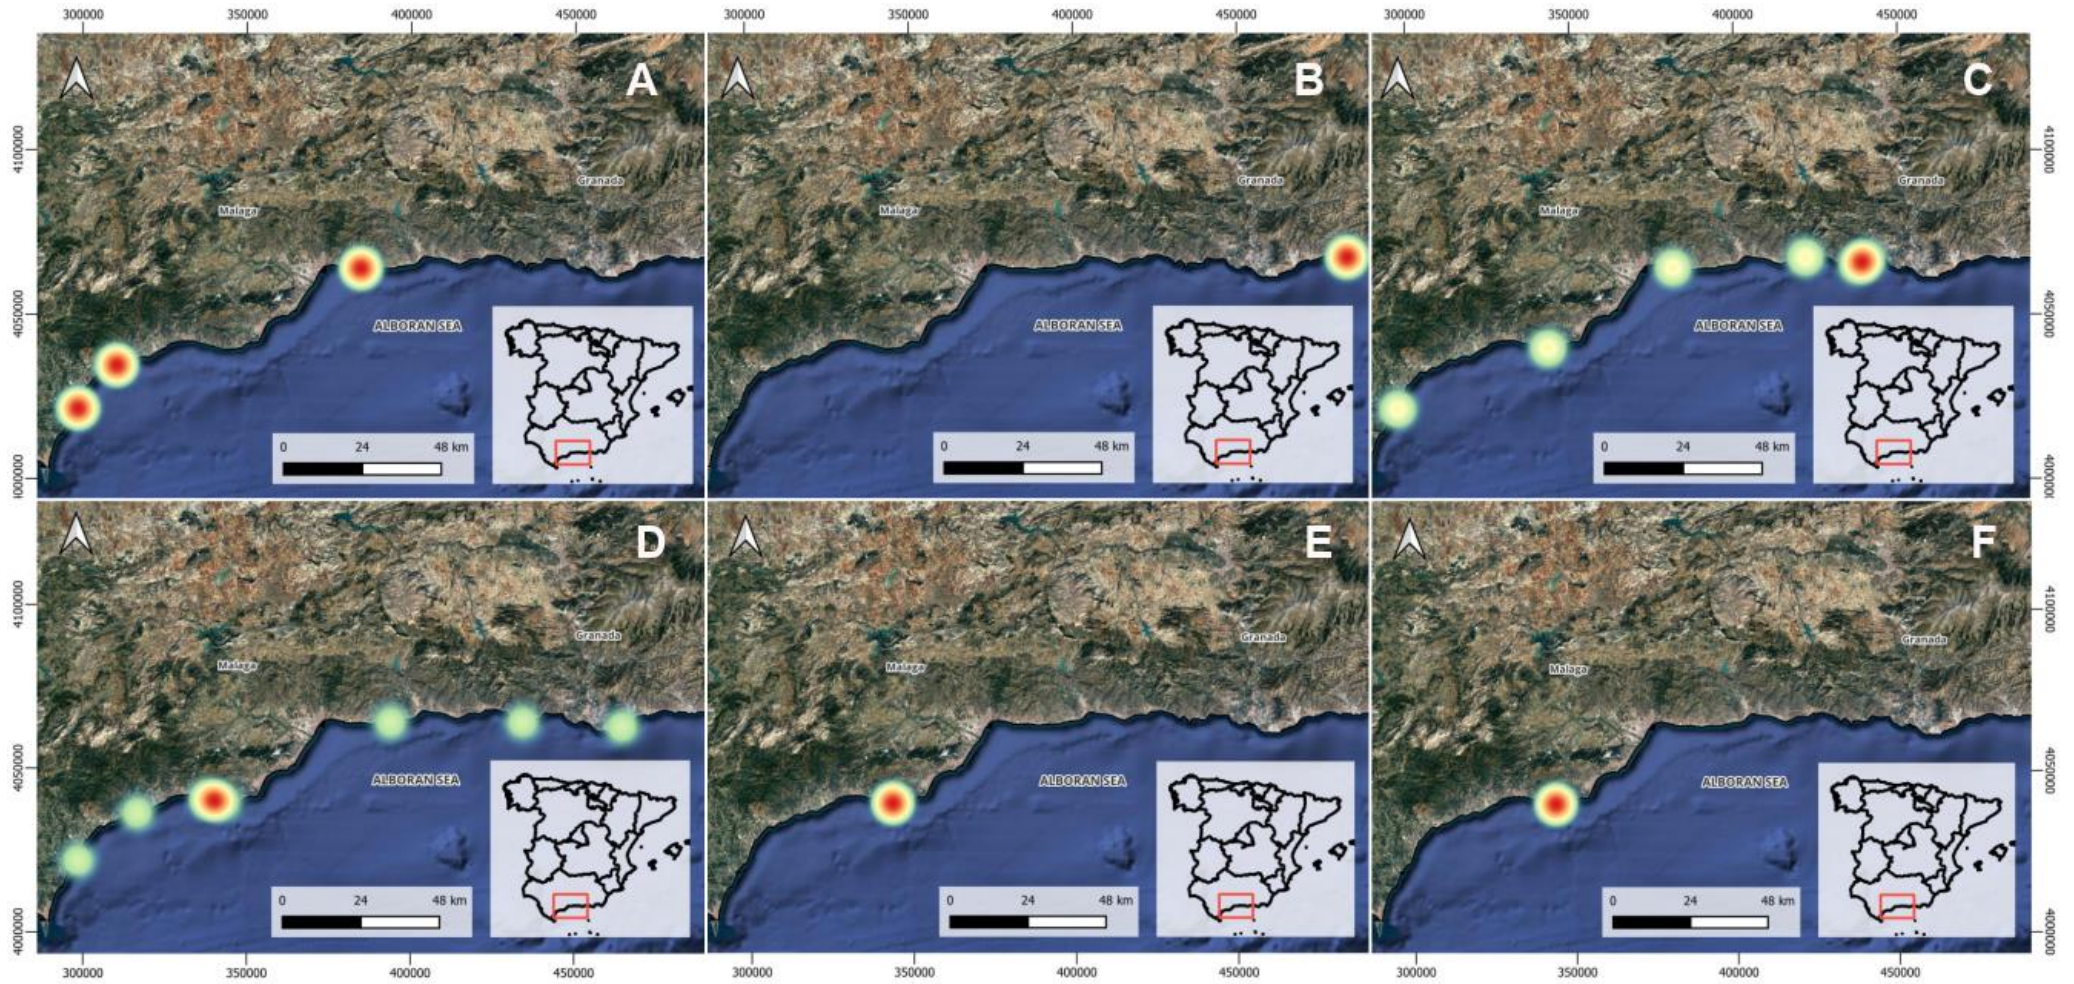

Figure S7. The heat distribution maps for potentially invasive based in reproductive and dispersal attributes. A: *Agave americana* subsp. *Americana*, B: *Agave fourcroydes* Lem., C: *Agave sisalana* Perrine, D: *Aloe arborescens* Mill., E: *Asparagus asparagoides* (L.) Druce, F: *Asparagus setaceus* (Kunth) Jessop,



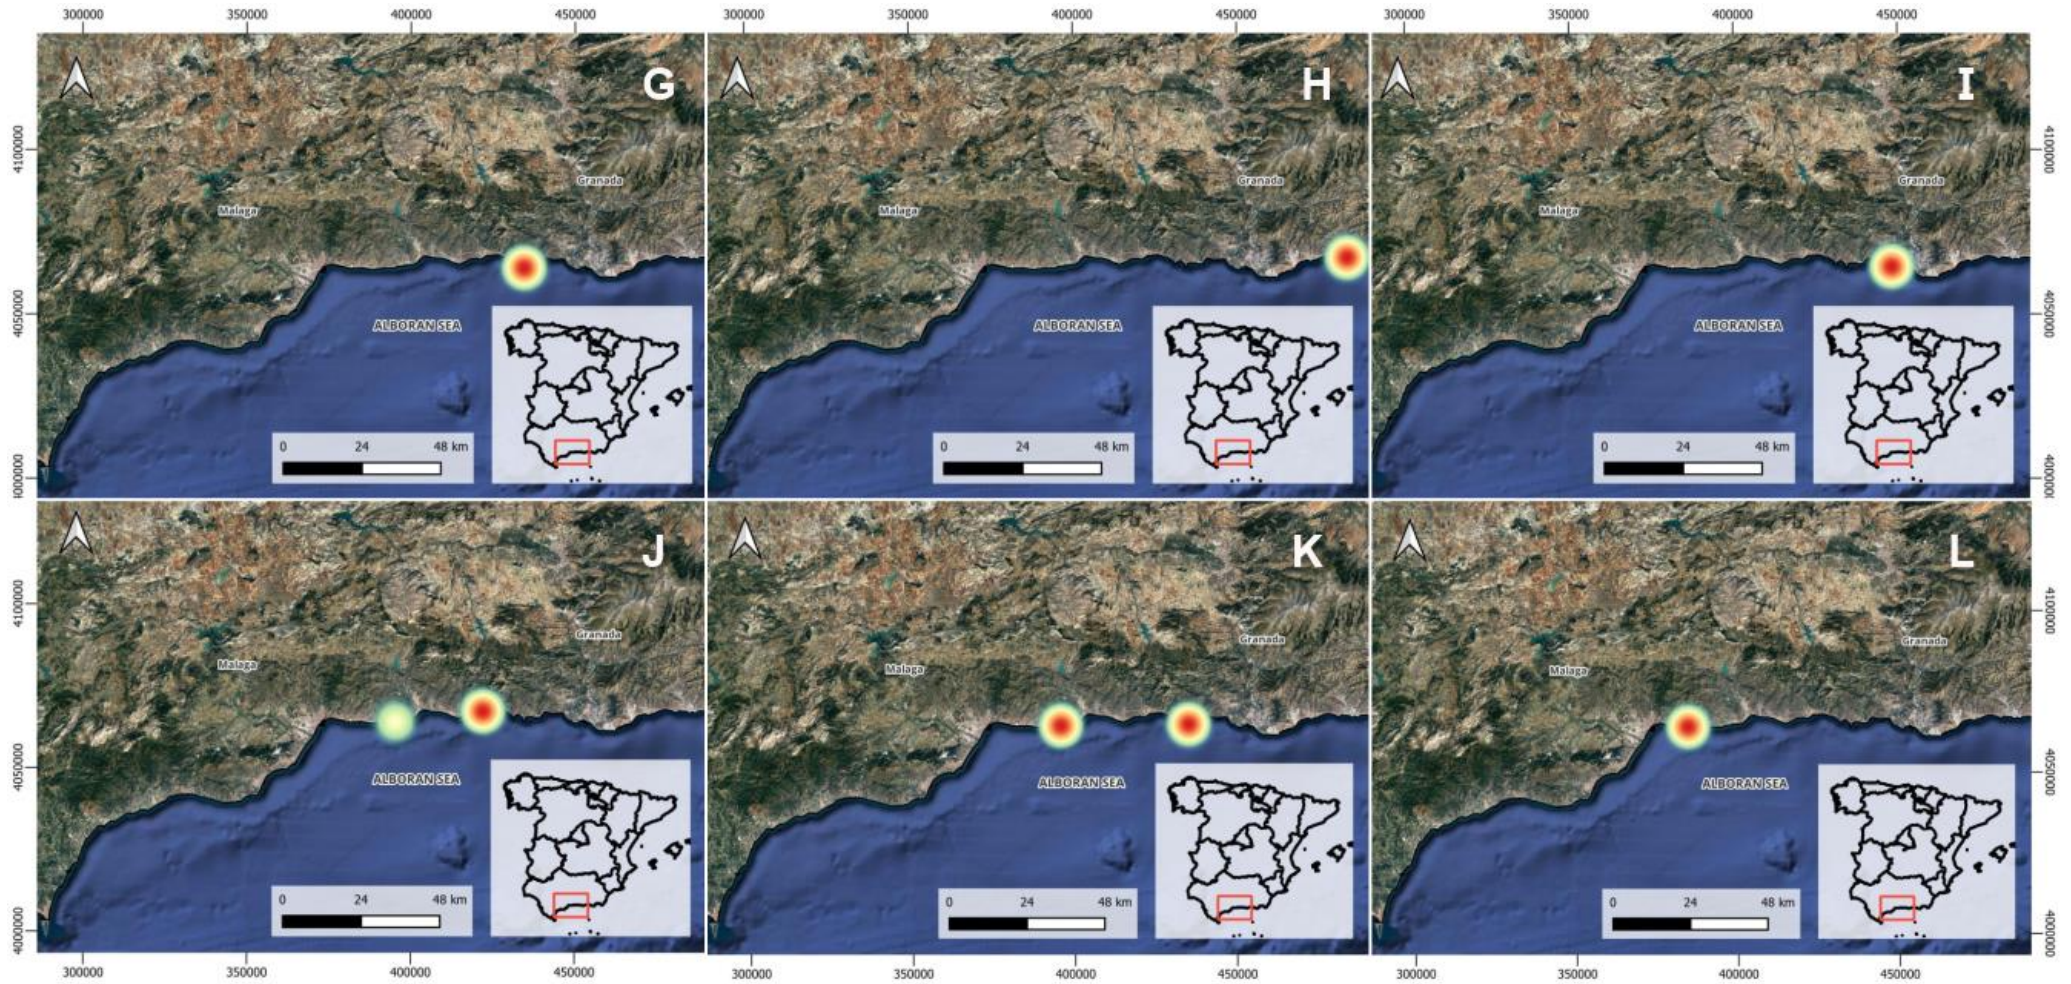

Figure S8. The heat distribution maps for potentially invasive based in reproductive and dispersal attributes. G: *Cylindropuntia x tetracantha* (Toumey) F.M.Knuth, H: *Cylindropuntia leptocaulis* (DC.) F.M.Knuth, I: *Ipomoea alba* L., J: *Ipomoea indica* (Burm.) Merr., K: *Ipomoea purpurea* (L.) Roth, L: *Kalanchoe x houghtonii* D.B. Ward



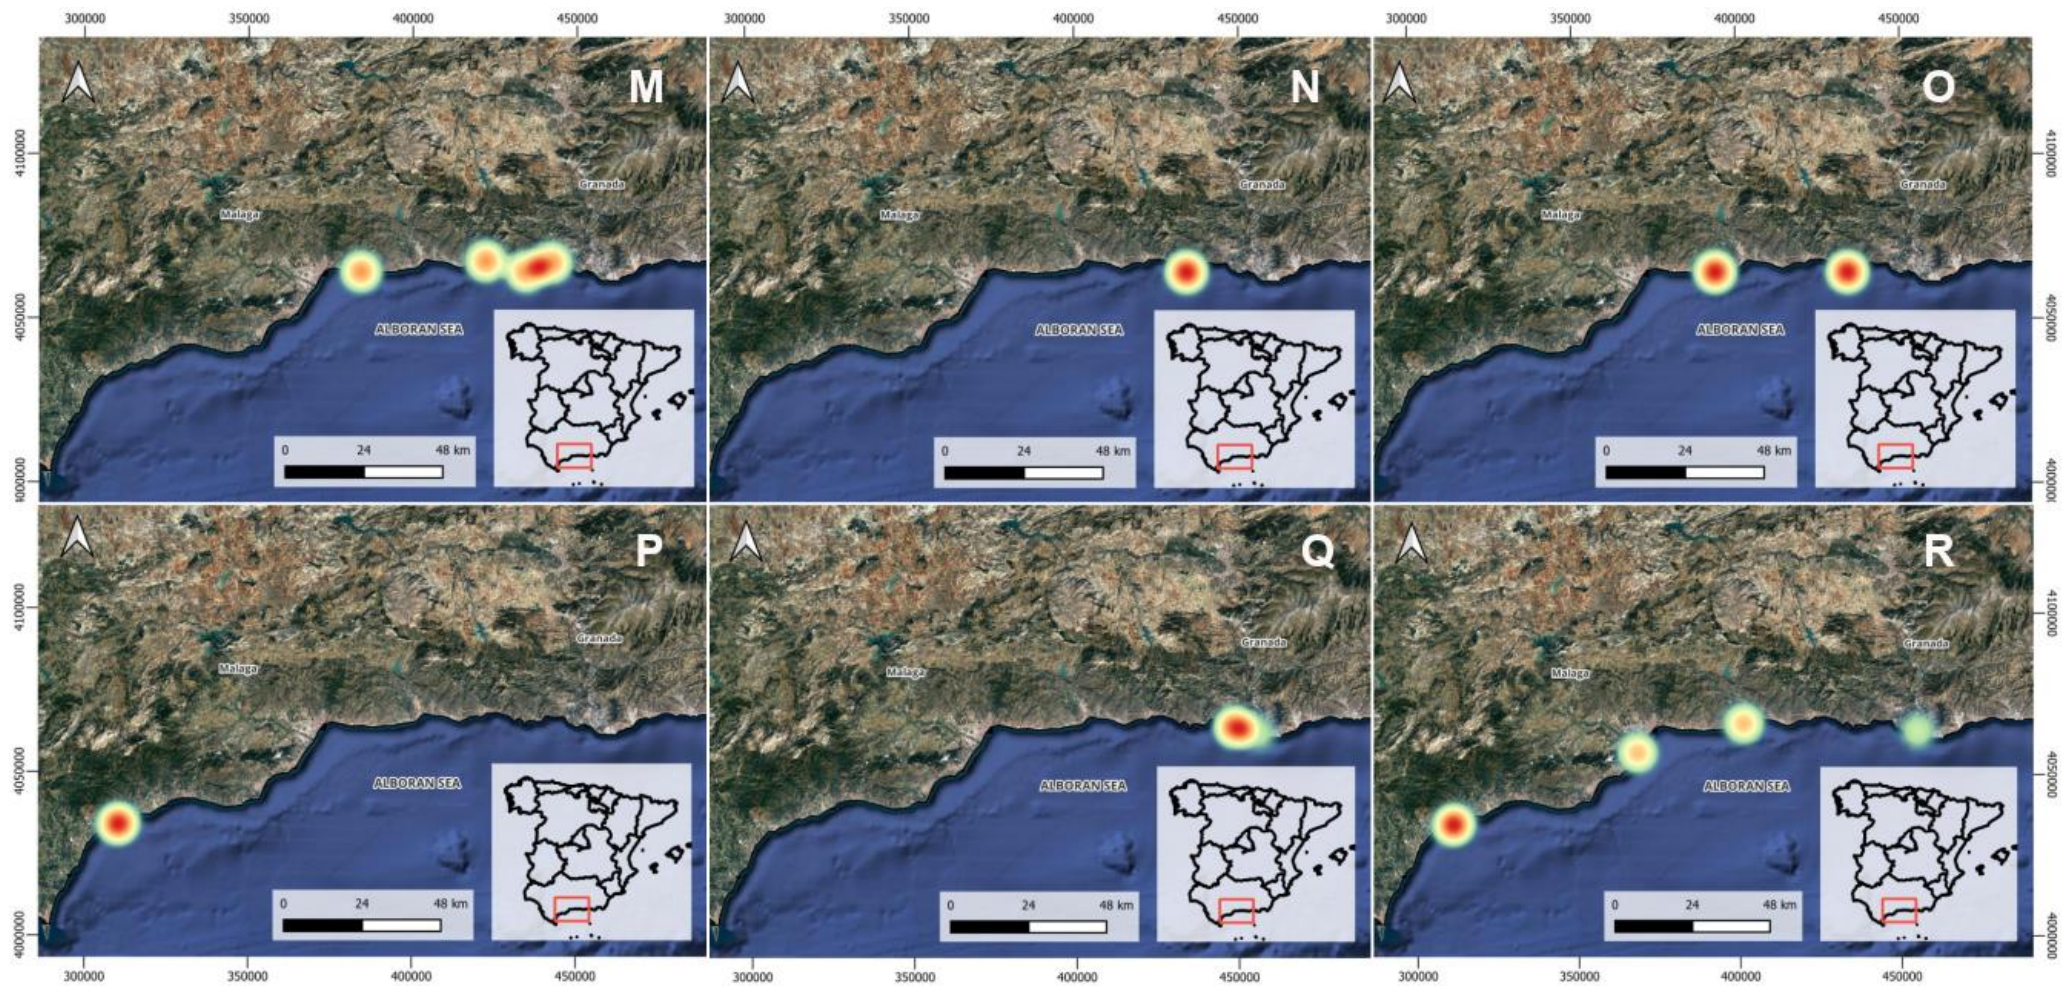

Figure S9. The heat distribution maps for potentially invasive based in reproductive and dispersal attributes. M: *Kleinia neriifolia* Haw., N: *Opuntia engelmannii* var. *lindheimeri* (Engelm.) B.D.Parfitt & Pinkava, O: *Opuntia tuna* (L.) Mill., P: *Paspalum distichum* L., Q: *Paspalum urvillei* Steud.



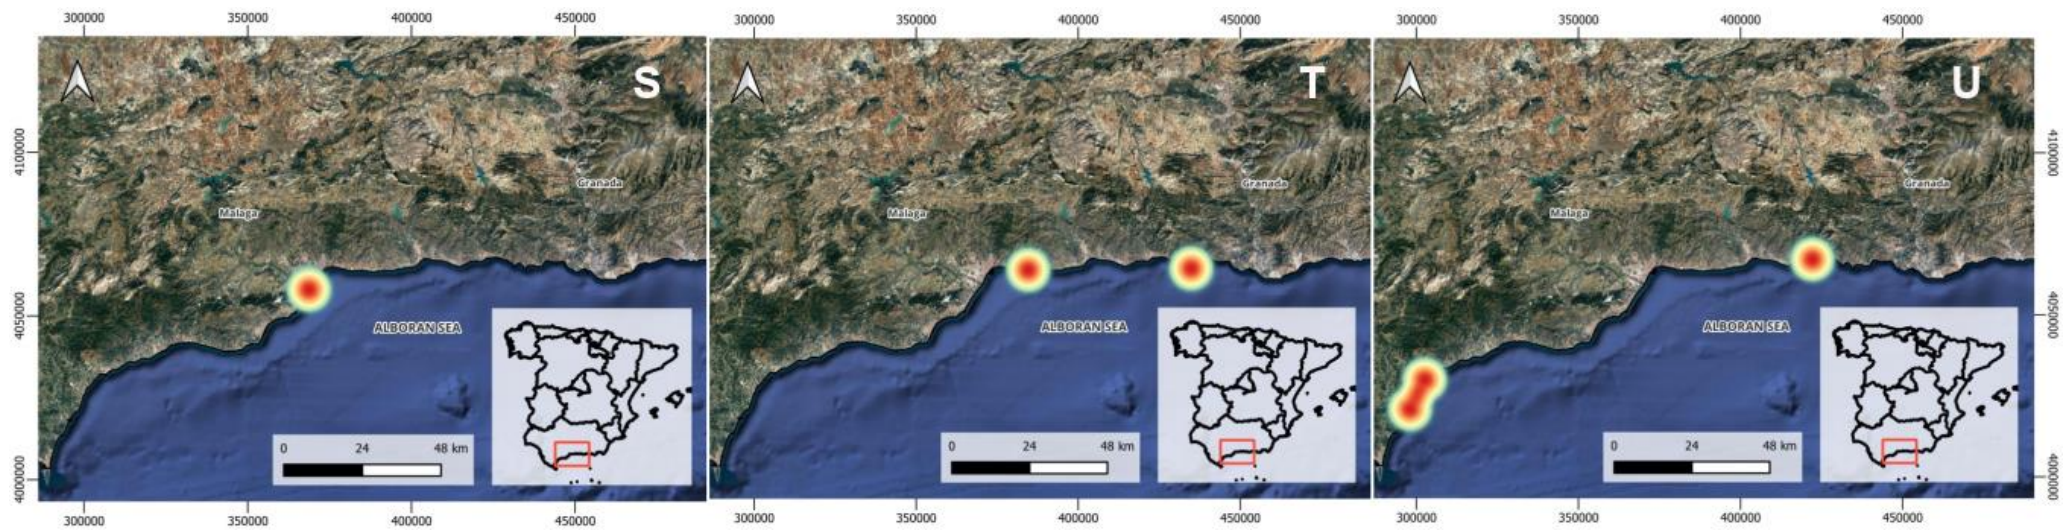

Figure S10. The heat distribution maps for potentially invasive based in reproductive and dispersal attributes. R: *Paspalum vaginatum* Sw., S: *Passiflora caerulea* L., T: *Senecio angulatus* L.f., U: *Tropaeolum majus* L.
